# Supplementary material
Source: MDPI journal article supplement (https://www.mdpi.com/2077-0472/13/7/1454)
Supplement: s1 [file s1]

The Degree of Financial Support for Agriculture across 31 provinces and cities in China is defined as the ratio of the Expenditure for Agriculture, Forestry, and Water Conservancy to the General Public Budget Expenditure. The respective values for the years 2017 to 2020 are presented in Table S1.

**Table S1.** 2017-2020 China's 31 provinces and cities degree of financial support for agriculture Calculation result statistics

|      |                   | Expenditure for<br>agriculture,Forestr<br>y and Water<br>Conservancy(100m<br>illionCNY) | General public<br>budget<br>expenditure(100millio<br>nCNY) | Degree of<br>financial support<br>for agriculture |
|------|-------------------|-----------------------------------------------------------------------------------------|------------------------------------------------------------|---------------------------------------------------|
| 2017 | Beijing           | 518.35                                                                                  | 6824.5284                                                  | 0.075953                                          |
| 2017 | Tianjin           | 158.36                                                                                  | 3282.5404                                                  | 0.048244                                          |
| 2017 | Hebei             | 782.91                                                                                  | 6639.184                                                   | 0.117923                                          |
| 2017 | Shanxi            | 477.91                                                                                  | 3756.4199                                                  | 0.127224                                          |
| 2017 | Inner<br>Mongolia | 807.71                                                                                  | 4529.9252                                                  | 0.178306                                          |
| 2017 | Liaoning          | 459.23                                                                                  | 4879.4234                                                  | 0.094116                                          |
| 2017 | Jilin             | 554.77                                                                                  | 3725.722                                                   | 0.148902                                          |
| 2017 | Heilongjiang      | 815.16                                                                                  | 4641.0771                                                  | 0.17564                                           |
| 2017 | Shanghai          | 456.53                                                                                  | 7547.6208                                                  | 0.060487                                          |
| 2017 | Jiangsu           | 918.22                                                                                  | 10621.0275                                                 | 0.086453                                          |
| 2017 | Zhejiang          | 696.69                                                                                  | 7530.3171                                                  | 0.092518                                          |
| 2017 | Anhui             | 681.91                                                                                  | 6203.811                                                   | 0.109918                                          |
| 2017 | Fujian            | 447.70                                                                                  | 4684.1517                                                  | 0.095578                                          |
| 2017 | Jiangxi           | 607.71                                                                                  | 5111.4673                                                  | 0.118891                                          |
| 2017 | Shandong          | 953.59                                                                                  | 9258.3984                                                  | 0.102997                                          |
| 2017 | Henan             | 916.81                                                                                  | 8215.5182                                                  | 0.111595                                          |
| 2017 | Hubei             | 714.73                                                                                  | 6801.2572                                                  | 0.105088                                          |
| 2017 | Hunan             | 782.42                                                                                  | 6869.3867                                                  | 0.1139                                            |
| 2017 | Guangdong         | 754.40                                                                                  | 15037.4788                                                 | 0.050168                                          |
| 2017 | Guangxi           | 646.87                                                                                  | 4908.5507                                                  | 0.131784                                          |
| 2017 | Hainan            | 198.42                                                                                  | 1443.9723                                                  | 0.13741                                           |
| 2017 | Chongqing         | 347.57                                                                                  | 4336.28                                                    | 0.080153                                          |
| 2017 | Sichuan           | 1023.13                                                                                 | 8694.7591                                                  | 0.117672                                          |
| 2017 | Guizhou           | 612.05                                                                                  | 4612.5164                                                  | 0.132693                                          |
| 2017 | Yunnan            | 674.82                                                                                  | 5712.9709                                                  | 0.11812                                           |
| 2017 | Tibet             | 238.09                                                                                  | 1681.9444                                                  | 0.141557                                          |
| 2017 | Shaanxi           | 545.40                                                                                  | 4833.1854                                                  | 0.112845                                          |
| 2017 | Gansu             | 520.79                                                                                  | 3304.4417                                                  | 0.157604                                          |
| 2017 | Qinghai           | 233.12                                                                                  | 1530.4375                                                  | 0.152322                                          |
| 2017 | Ningxia           | 222.39                                                                                  | 1372.7841                                                  | 0.161998                                          |
| 2017 | Xinjiang          | 612.49                                                                                  | 4637.2435                                                  | 0.13208                                           |

|      |                   |         |            |          |
|------|-------------------|---------|------------|----------|
| 2018 | Beijing           | 576.04  | 7471.4332  | 0.077099 |
| 2018 | Tianjin           | 165.71  | 3103.1579  | 0.0534   |
| 2018 | Hebei             | 906.27  | 7726.2086  | 0.117298 |
| 2018 | Shanxi            | 581.34  | 4283.9099  | 0.135703 |
| 2018 | Inner<br>Mongolia | 903.96  | 4831.4587  | 0.187099 |
| 2018 | Liaoning          | 461.74  | 5337.715   | 0.086505 |
| 2018 | Jilin             | 537.55  | 3789.5894  | 0.141849 |
| 2018 | Heilongjiang      | 834.47  | 4676.7503  | 0.178429 |
| 2018 | Shanghai          | 469.88  | 8351.5376  | 0.056263 |
| 2018 | Jiangsu           | 996.67  | 11657.3521 | 0.085497 |
| 2018 | Zhejiang          | 724.46  | 8629.5256  | 0.083951 |
| 2018 | Anhui             | 704.86  | 6572.1484  | 0.10725  |
| 2018 | Fujian            | 431.51  | 4832.693   | 0.08929  |
| 2018 | Jiangxi           | 599.41  | 5667.5207  | 0.105762 |
| 2018 | Shandong          | 998.50  | 10100.9606 | 0.098852 |
| 2018 | Henan             | 1001.08 | 9217.7286  | 0.108604 |
| 2018 | Hubei             | 785.55  | 7258.2663  | 0.108228 |
| 2018 | Hunan             | 925.57  | 7479.6148  | 0.123746 |
| 2018 | Guangdong         | 909.78  | 15729.2571 | 0.05784  |
| 2018 | Guangxi           | 656.58  | 5310.741   | 0.123632 |
| 2018 | Hainan            | 227.71  | 1691.3027  | 0.134636 |
| 2018 | Chongqing         | 366.77  | 4540.9487  | 0.080769 |
| 2018 | Sichuan           | 1310.89 | 9707.5048  | 0.135039 |
| 2018 | Guizhou           | 664.84  | 5029.6774  | 0.132183 |
| 2018 | Yunnan            | 842.20  | 6075.0283  | 0.138633 |
| 2018 | Tibet             | 364.64  | 1970.6768  | 0.185033 |
| 2018 | Shaanxi           | 626.79  | 5302.443   | 0.118208 |
| 2018 | Gansu             | 678.35  | 3772.233   | 0.179827 |
| 2018 | Qinghai           | 267.85  | 1647.4296  | 0.162587 |
| 2018 | Ningxia           | 219.06  | 1419.0592  | 0.15437  |
| 2018 | Xinjiang          | 753.25  | 5012.4518  | 0.150276 |
| 2019 | Beijing           | 584.62  | 7408.1876  | 0.078915 |
| 2019 | Tianjin           | 161.51  | 3555.7052  | 0.045423 |
| 2019 | Hebei             | 978.27  | 8309.0391  | 0.117736 |
| 2019 | Shanxi            | 626.04  | 4710.7629  | 0.132896 |
| 2019 | Inner<br>Mongolia | 874.73  | 5100.9101  | 0.171485 |
| 2019 | Liaoning          | 502.57  | 5745.0884  | 0.087478 |
| 2019 | Jilin             | 564.35  | 3933.4231  | 0.143476 |
| 2019 | Heilongjiang      | 881.99  | 5011.5589  | 0.175991 |
| 2019 | Shanghai          | 523.10  | 8179.284   | 0.063954 |
| 2019 | Jiangsu           | 1032.37 | 12573.5537 | 0.082106 |
| 2019 | Zhejiang          | 744.24  | 10053.0335 | 0.074031 |

|      |                   |         |            |          |
|------|-------------------|---------|------------|----------|
| 2019 | Anhui             | 736.27  | 7392.2226  | 0.099601 |
| 2019 | Fujian            | 442.06  | 5077.9329  | 0.087055 |
| 2019 | Jiangxi           | 619.80  | 6386.8022  | 0.097044 |
| 2019 | Shandong          | 1075.98 | 10739.756  | 0.100187 |
| 2019 | Henan             | 1059.70 | 10163.9304 | 0.104261 |
| 2019 | Hubei             | 828.21  | 7970.207   | 0.103913 |
| 2019 | Hunan             | 978.68  | 8034.4155  | 0.121811 |
| 2019 | Guangdong         | 957.68  | 17297.8532 | 0.055364 |
| 2019 | Guangxi           | 747.21  | 5850.9609  | 0.127707 |
| 2019 | Hainan            | 251.40  | 1858.597   | 0.135263 |
| 2019 | Chongqing         | 389.53  | 4847.6795  | 0.080354 |
| 2019 | Sichuan           | 1288.42 | 10348.1712 | 0.124507 |
| 2019 | Guizhou           | 998.90  | 5948.7444  | 0.167918 |
| 2019 | Yunnan            | 1117.20 | 6770.0881  | 0.16502  |
| 2019 | Tibet             | 445.01  | 2187.7492  | 0.20341  |
| 2019 | Shaanxi           | 684.18  | 5718.5163  | 0.119643 |
| 2019 | Gansu             | 716.76  | 3951.5991  | 0.181385 |
| 2019 | Qinghai           | 324.09  | 1863.6676  | 0.173899 |
| 2019 | Ningxia           | 218.16  | 1438.2916  | 0.15168  |
| 2019 | Xinjiang          | 977.41  | 5315.49    | 0.18388  |
| 2020 | Beijing           | 497.33  | 7116.1764  | 0.069887 |
| 2020 | Tianjin           | 154.82  | 3151.3505  | 0.049128 |
| 2020 | Hebei             | 988.74  | 9022.7941  | 0.109582 |
| 2020 | Shanxi            | 653.68  | 5110.8746  | 0.1279   |
| 2020 | Inner<br>Mongolia | 867.59  | 5270.1616  | 0.164623 |
| 2020 | Liaoning          | 504.83  | 6014.1675  | 0.08394  |
| 2020 | Jilin             | 577.76  | 4127.1714  | 0.139989 |
| 2020 | Heilongjiang      | 914.53  | 5449.411   | 0.167822 |
| 2020 | Shanghai          | 473.80  | 8102.112   | 0.058479 |
| 2020 | Jiangsu           | 1091.25 | 13681.5522 | 0.079761 |
| 2020 | Zhejiang          | 764.89  | 10082.008  | 0.075867 |
| 2020 | Anhui             | 924.29  | 7473.5925  | 0.123674 |
| 2020 | Fujian            | 450.05  | 5216.0979  | 0.086281 |
| 2020 | Jiangxi           | 740.31  | 6674.0791  | 0.110923 |
| 2020 | Shandong          | 1065.29 | 11233.5163 | 0.094831 |
| 2020 | Henan             | 1145.40 | 10372.6749 | 0.110425 |
| 2020 | Hubei             | 868.90  | 8442.8818  | 0.102915 |
| 2020 | Hunan             | 987.71  | 8403.1337  | 0.117541 |
| 2020 | Guangdong         | 1125.81 | 17430.7853 | 0.064587 |
| 2020 | Guangxi           | 904.38  | 6179.4664  | 0.146352 |
| 2020 | Hainan            | 268.57  | 1972.4636  | 0.13616  |
| 2020 | Chongqing         | 416.76  | 4893.9461  | 0.085158 |
| 2020 | Sichuan           | 1339.36 | 11198.5355 | 0.119601 |

|      |          |         |           |          |
|------|----------|---------|-----------|----------|
| 2020 | Guizhou  | 1024.31 | 5739.4958 | 0.178467 |
| 2020 | Yunnan   | 1100.13 | 6974.0176 | 0.157747 |
| 2020 | Tibet    | 415.44  | 2210.9192 | 0.187904 |
| 2020 | Shaanxi  | 742.25  | 5930.3198 | 0.125162 |
| 2020 | Gansu    | 775.83  | 4163.399  | 0.186345 |
| 2020 | Qinghai  | 279.80  | 1932.8396 | 0.144761 |
| 2020 | Ningxia  | 253.45  | 1480.3577 | 0.171209 |
| 2020 | Xinjiang | 1127.88 | 5533.1576 | 0.20384  |

Degree of agribusiness: This represents the scale and industrial transformation of agricultural production, calculated as the ratio of the number of agricultural legal entities to the total number of legal entities in each province and city. The data on the number of agricultural legal entities for each province in 2018 is missing and is supplemented using linear interpolation.

**Table S2.** 2017-2020 China's 31 provinces and cities degree of agribusiness Calculation result statistics

|      |                | number of<br>agricultural legal<br>entities | total number<br>of legal<br>entities | Degree of<br>agribusiness |
|------|----------------|---------------------------------------------|--------------------------------------|---------------------------|
| 2017 | Beijing        | 9008                                        | 719624                               | 0.012518                  |
| 2017 | Tianjin        | 12322                                       | 444546                               | 0.027718                  |
| 2017 | Hebei          | 89801                                       | 1147414                              | 0.078264                  |
| 2017 | Shanxi         | 99121                                       | 600802                               | 0.164981                  |
| 2017 | Inner Mongolia | 53418                                       | 328901                               | 0.162414                  |
| 2017 | Liaoning       | 30723                                       | 655309                               | 0.046883                  |
| 2017 | Jilin          | 19420                                       | 209045                               | 0.092899                  |
| 2017 | Heilongjiang   | 47322                                       | 335310                               | 0.141129                  |
| 2017 | Shanghai       | 6375                                        | 484495                               | 0.013158                  |
| 2017 | Jiangsu        | 49738                                       | 2356034                              | 0.021111                  |
| 2017 | Zhejiang       | 65778                                       | 1792465                              | 0.036697                  |
| 2017 | Anhui          | 93247                                       | 872865                               | 0.106829                  |
| 2017 | Fujian         | 50706                                       | 870050                               | 0.058279                  |
| 2017 | Jiangxi        | 60700                                       | 573013                               | 0.105931                  |
| 2017 | Shandong       | 114194                                      | 2015001                              | 0.056672                  |
| 2017 | Henan          | 76844                                       | 964944                               | 0.079636                  |
| 2017 | Hubei          | 85154                                       | 943502                               | 0.090253                  |
| 2017 | Hunan          | 60149                                       | 685025                               | 0.087806                  |
| 2017 | Guangdong      | 37645                                       | 1955087                              | 0.019255                  |
| 2017 | Guangxi        | 77842                                       | 539342                               | 0.144328                  |
| 2017 | Hainan         | 11912                                       | 100398                               | 0.118648                  |
| 2017 | Chongqing      | 105628                                      | 598575                               | 0.176466                  |
| 2017 | Sichuan        | 71812                                       | 629919                               | 0.114002                  |
| 2017 | Guizhou        | 97661                                       | 447650                               | 0.218164                  |
| 2017 | Yunnan         | 103864                                      | 579001                               | 0.179385                  |

|      |                |        |         |          |
|------|----------------|--------|---------|----------|
| 2017 | Tibet          | 589    | 26600   | 0.022143 |
| 2017 | Shaanxi        | 50032  | 462710  | 0.108128 |
| 2017 | Gansu          | 36953  | 222361  | 0.166185 |
| 2017 | Qinghai        | 21704  | 108773  | 0.199535 |
| 2017 | Ningxia        | 13909  | 90563   | 0.153584 |
| 2017 | Xinjiang       | 17203  | 249768  | 0.068876 |
| 2018 | Beijing        | 7828   | 816497  | 0.009587 |
| 2018 | Tianjin        | 12087  | 383143  | 0.031547 |
| 2018 | Hebei          | 96906  | 1232868 | 0.078602 |
| 2018 | Shanxi         | 94116  | 617381  | 0.152444 |
| 2018 | Inner Mongolia | 53420  | 355286  | 0.150358 |
| 2018 | Liaoning       | 36513  | 638233  | 0.05721  |
| 2018 | Jilin          | 21686  | 210559  | 0.102993 |
| 2018 | Heilongjiang   | 46711  | 315631  | 0.147992 |
| 2018 | Shanghai       | 5747   | 483424  | 0.011888 |
| 2018 | Jiangsu        | 44594  | 2341626 | 0.019044 |
| 2018 | Zhejiang       | 55754  | 1849022 | 0.030153 |
| 2018 | Anhui          | 92469  | 909687  | 0.101649 |
| 2018 | Fujian         | 48545  | 905674  | 0.053601 |
| 2018 | Jiangxi        | 62396  | 571605  | 0.109159 |
| 2018 | Shandong       | 107175 | 2162184 | 0.049568 |
| 2018 | Henan          | 99616  | 1191881 | 0.083579 |
| 2018 | Hubei          | 71367  | 975224  | 0.07318  |
| 2018 | Hunan          | 58383  | 678662  | 0.086027 |
| 2018 | Guangdong      | 37883  | 2652122 | 0.014284 |
| 2018 | Guangxi        | 76872  | 590423  | 0.130198 |
| 2018 | Hainan         | 11628  | 112970  | 0.10293  |
| 2018 | Chongqing      | 90309  | 594972  | 0.151787 |
| 2018 | Sichuan        | 79788  | 748698  | 0.106569 |
| 2018 | Guizhou        | 99883  | 459401  | 0.21742  |
| 2018 | Yunnan         | 94728  | 575211  | 0.164684 |
| 2018 | Tibet          | 1544   | 37896   | 0.040743 |
| 2018 | Shaanxi        | 49307  | 524858  | 0.093944 |
| 2018 | Gansu          | 45114  | 244481  | 0.18453  |
| 2018 | Qinghai        | 19966  | 103645  | 0.192638 |
| 2018 | Ningxia        | 15635  | 101911  | 0.153418 |
| 2018 | Xinjiang       | 18812  | 259486  | 0.072497 |
| 2019 | Beijing        | 6648   | 913369  | 0.007279 |
| 2019 | Tianjin        | 11851  | 321740  | 0.036834 |
| 2019 | Hebei          | 104011 | 1318321 | 0.078897 |
| 2019 | Shanxi         | 89111  | 633960  | 0.140562 |
| 2019 | Inner Mongolia | 53421  | 381670  | 0.139966 |
| 2019 | Liaoning       | 42302  | 621156  | 0.068102 |
| 2019 | Jilin          | 23952  | 212073  | 0.112942 |

|      |                |        |         |          |
|------|----------------|--------|---------|----------|
| 2019 | Heilongjiang   | 46100  | 295952  | 0.155769 |
| 2019 | Shanghai       | 5118   | 482353  | 0.01061  |
| 2019 | Jiangsu        | 39449  | 2327217 | 0.016951 |
| 2019 | Zhejiang       | 45729  | 1905578 | 0.023997 |
| 2019 | Anhui          | 91691  | 946508  | 0.096873 |
| 2019 | Fujian         | 46383  | 941297  | 0.049276 |
| 2019 | Jiangxi        | 64092  | 570196  | 0.112403 |
| 2019 | Shandong       | 100155 | 2309367 | 0.043369 |
| 2019 | Henan          | 122388 | 1418818 | 0.086261 |
| 2019 | Hubei          | 57579  | 1006945 | 0.057182 |
| 2019 | Hunan          | 56616  | 672298  | 0.084213 |
| 2019 | Guangdong      | 38120  | 3349156 | 0.011382 |
| 2019 | Guangxi        | 75901  | 641503  | 0.118317 |
| 2019 | Hainan         | 11343  | 125542  | 0.090352 |
| 2019 | Chongqing      | 74990  | 591369  | 0.126807 |
| 2019 | Sichuan        | 87763  | 867477  | 0.10117  |
| 2019 | Guizhou        | 102105 | 471151  | 0.216714 |
| 2019 | Yunnan         | 85592  | 571421  | 0.149788 |
| 2019 | Tibet          | 2498   | 49191   | 0.050782 |
| 2019 | Shaanxi        | 48581  | 587005  | 0.082761 |
| 2019 | Gansu          | 53275  | 266600  | 0.199831 |
| 2019 | Qinghai        | 18227  | 98516   | 0.185016 |
| 2019 | Ningxia        | 17361  | 113259  | 0.153286 |
| 2019 | Xinjiang       | 20421  | 269203  | 0.075857 |
| 2020 | Beijing        | 6858   | 1174904 | 0.005837 |
| 2020 | Tianjin        | 10684  | 371124  | 0.028788 |
| 2020 | Hebei          | 106861 | 1456954 | 0.073345 |
| 2020 | Shanxi         | 97184  | 772765  | 0.125761 |
| 2020 | Inner Mongolia | 60334  | 439523  | 0.137272 |
| 2020 | Liaoning       | 50296  | 748782  | 0.06717  |
| 2020 | Jilin          | 26302  | 237731  | 0.110638 |
| 2020 | Heilongjiang   | 53748  | 344360  | 0.156081 |
| 2020 | Shanghai       | 5200   | 532762  | 0.00976  |
| 2020 | Jiangsu        | 41935  | 2540015 | 0.01651  |
| 2020 | Zhejiang       | 48515  | 2277240 | 0.021304 |
| 2020 | Anhui          | 96705  | 1160828 | 0.083307 |
| 2020 | Fujian         | 54003  | 1156978 | 0.046676 |
| 2020 | Jiangxi        | 77906  | 765836  | 0.101727 |
| 2020 | Shandong       | 127605 | 2842426 | 0.044893 |
| 2020 | Henan          | 136573 | 1652264 | 0.082658 |
| 2020 | Hubei          | 67468  | 1183265 | 0.057019 |
| 2020 | Hunan          | 66175  | 831104  | 0.079623 |
| 2020 | Guangdong      | 40563  | 3526206 | 0.011503 |
| 2020 | Guangxi        | 81140  | 754741  | 0.107507 |

|             |                  |        |        |          |
|-------------|------------------|--------|--------|----------|
| <b>2020</b> | <b>Hainan</b>    | 11535  | 140362 | 0.08218  |
| <b>2020</b> | <b>Chongqing</b> | 78978  | 642720 | 0.122881 |
| <b>2020</b> | <b>Sichuan</b>   | 93708  | 934554 | 0.10027  |
| <b>2020</b> | <b>Guizhou</b>   | 108209 | 543603 | 0.199059 |
| <b>2020</b> | <b>Yunnan</b>    | 97737  | 741669 | 0.13178  |
| <b>2020</b> | <b>Tibet</b>     | 2533   | 49889  | 0.050773 |
| <b>2020</b> | <b>Shaanxi</b>   | 55017  | 689053 | 0.079844 |
| <b>2020</b> | <b>Gansu</b>     | 61979  | 302596 | 0.204824 |
| <b>2020</b> | <b>Qinghai</b>   | 18304  | 112136 | 0.16323  |
| <b>2020</b> | <b>Ningxia</b>   | 18974  | 133774 | 0.141836 |
| <b>2020</b> | <b>Xinjiang</b>  | 24392  | 329091 | 0.074119 |

Percentage of Rural Population: The Chinese Statistical Yearbook only has data on the percentage of urban population , which can be subtracted from 1 to get the percentage of Rural Population.

**Table S3.** 2017-2020 China's 31 provinces and cities percentage of rural population calculation result statistics

|             |                       | <b>Percentage of urban<br/>population(%)</b> | <b>Percentage of Rural<br/>Population(%)</b> |
|-------------|-----------------------|----------------------------------------------|----------------------------------------------|
| <b>2017</b> | <b>Beijing</b>        | 86.93                                        | 0.1307                                       |
| <b>2017</b> | <b>Tianjin</b>        | 83.57                                        | 0.1643                                       |
| <b>2017</b> | <b>Hebei</b>          | 55.74                                        | 0.4426                                       |
| <b>2017</b> | <b>Shanxi</b>         | 58.59                                        | 0.4141                                       |
| <b>2017</b> | <b>Inner Mongolia</b> | 64.6                                         | 0.354                                        |
| <b>2017</b> | <b>Liaoning</b>       | 69.49                                        | 0.3051                                       |
| <b>2017</b> | <b>Jilin</b>          | 59.71                                        | 0.4029                                       |
| <b>2017</b> | <b>Heilongjiang</b>   | 61.9                                         | 0.381                                        |
| <b>2017</b> | <b>Shanghai</b>       | 89.1                                         | 0.109                                        |
| <b>2017</b> | <b>Jiangsu</b>        | 70.18                                        | 0.2982                                       |
| <b>2017</b> | <b>Zhejiang</b>       | 68.91                                        | 0.3109                                       |
| <b>2017</b> | <b>Anhui</b>          | 54.29                                        | 0.4571                                       |
| <b>2017</b> | <b>Fujian</b>         | 65.78                                        | 0.3422                                       |
| <b>2017</b> | <b>Jiangxi</b>        | 55.7                                         | 0.443                                        |
| <b>2017</b> | <b>Shandong</b>       | 60.79                                        | 0.3921                                       |
| <b>2017</b> | <b>Henan</b>          | 50.56                                        | 0.4944                                       |
| <b>2017</b> | <b>Hubei</b>          | 59.88                                        | 0.4012                                       |
| <b>2017</b> | <b>Hunan</b>          | 54.62                                        | 0.4538                                       |
| <b>2017</b> | <b>Guangdong</b>      | 70.74                                        | 0.2926                                       |
| <b>2017</b> | <b>Guangxi</b>        | 50.59                                        | 0.4941                                       |
| <b>2017</b> | <b>Hainan</b>         | 58.04                                        | 0.4196                                       |
| <b>2017</b> | <b>Chongqing</b>      | 65                                           | 0.35                                         |
| <b>2017</b> | <b>Sichuan</b>        | 51.78                                        | 0.4822                                       |
| <b>2017</b> | <b>Guizhou</b>        | 47.76                                        | 0.5224                                       |
| <b>2017</b> | <b>Yunnan</b>         | 46.29                                        | 0.5371                                       |

|      |                |       |        |
|------|----------------|-------|--------|
| 2017 | Tibet          | 33.38 | 0.6662 |
| 2017 | Shaanxi        | 58.07 | 0.4193 |
| 2017 | Gansu          | 48.12 | 0.5188 |
| 2017 | Qinghai        | 55.45 | 0.4455 |
| 2017 | Ningxia        | 60.95 | 0.3905 |
| 2017 | Xinjiang       | 51.9  | 0.481  |
| 2018 | Beijing        | 87.09 | 0.1291 |
| 2018 | Tianjin        | 83.95 | 0.1605 |
| 2018 | Hebei          | 57.33 | 0.4267 |
| 2018 | Shanxi         | 59.85 | 0.4015 |
| 2018 | Inner Mongolia | 65.51 | 0.3449 |
| 2018 | Liaoning       | 70.26 | 0.2974 |
| 2018 | Jilin          | 60.85 | 0.3915 |
| 2018 | Heilongjiang   | 63.46 | 0.3654 |
| 2018 | Shanghai       | 89.13 | 0.1087 |
| 2018 | Jiangsu        | 71.19 | 0.2881 |
| 2018 | Zhejiang       | 70.02 | 0.2998 |
| 2018 | Anhui          | 55.65 | 0.4435 |
| 2018 | Fujian         | 66.98 | 0.3302 |
| 2018 | Jiangxi        | 57.34 | 0.4266 |
| 2018 | Shandong       | 61.46 | 0.3854 |
| 2018 | Henan          | 52.24 | 0.4776 |
| 2018 | Hubei          | 61    | 0.39   |
| 2018 | Hunan          | 56.09 | 0.4391 |
| 2018 | Guangdong      | 71.81 | 0.2819 |
| 2018 | Guangxi        | 51.82 | 0.4818 |
| 2018 | Hainan         | 59.13 | 0.4087 |
| 2018 | Chongqing      | 66.61 | 0.3339 |
| 2018 | Sichuan        | 53.5  | 0.465  |
| 2018 | Guizhou        | 49.54 | 0.5046 |
| 2018 | Yunnan         | 47.44 | 0.5256 |
| 2018 | Tibet          | 33.8  | 0.662  |
| 2018 | Shaanxi        | 59.65 | 0.4035 |
| 2018 | Gansu          | 49.69 | 0.5031 |
| 2018 | Qinghai        | 57.27 | 0.4273 |
| 2018 | Ningxia        | 62.15 | 0.3785 |
| 2018 | Xinjiang       | 54.01 | 0.4599 |
| 2019 | Beijing        | 87.35 | 0.1265 |
| 2019 | Tianjin        | 84.31 | 0.1569 |
| 2019 | Hebei          | 58.77 | 0.4123 |
| 2019 | Shanxi         | 61.29 | 0.3871 |
| 2019 | Inner Mongolia | 66.46 | 0.3354 |
| 2019 | Liaoning       | 71.21 | 0.2879 |
| 2019 | Jilin          | 61.63 | 0.3837 |



|      |                |       |        |
|------|----------------|-------|--------|
| 2019 | Heilongjiang   | 64.62 | 0.3538 |
| 2019 | Shanghai       | 89.22 | 0.1078 |
| 2019 | Jiangsu        | 72.47 | 0.2753 |
| 2019 | Zhejiang       | 71.58 | 0.2842 |
| 2019 | Anhui          | 57.02 | 0.4298 |
| 2019 | Fujian         | 67.87 | 0.3213 |
| 2019 | Jiangxi        | 59.07 | 0.4093 |
| 2019 | Shandong       | 61.86 | 0.3814 |
| 2019 | Henan          | 54.01 | 0.4599 |
| 2019 | Hubei          | 61.83 | 0.3817 |
| 2019 | Hunan          | 57.45 | 0.4255 |
| 2019 | Guangdong      | 72.65 | 0.2735 |
| 2019 | Guangxi        | 52.98 | 0.4702 |
| 2019 | Hainan         | 59.37 | 0.4063 |
| 2019 | Chongqing      | 68.24 | 0.3176 |
| 2019 | Sichuan        | 55.36 | 0.4464 |
| 2019 | Guizhou        | 51.48 | 0.4852 |
| 2019 | Yunnan         | 48.67 | 0.5133 |
| 2019 | Tibet          | 34.51 | 0.6549 |
| 2019 | Shaanxi        | 61.28 | 0.3872 |
| 2019 | Gansu          | 50.7  | 0.493  |
| 2019 | Qinghai        | 58.78 | 0.4122 |
| 2019 | Ningxia        | 63.63 | 0.3637 |
| 2019 | Xinjiang       | 55.51 | 0.4449 |
| 2020 | Beijing        | 87.55 | 0.1245 |
| 2020 | Tianjin        | 84.7  | 0.153  |
| 2020 | Hebei          | 60.07 | 0.3993 |
| 2020 | Shanxi         | 62.53 | 0.3747 |
| 2020 | Inner Mongolia | 67.48 | 0.3252 |
| 2020 | Liaoning       | 72.14 | 0.2786 |
| 2020 | Jilin          | 62.64 | 0.3736 |
| 2020 | Heilongjiang   | 65.61 | 0.3439 |
| 2020 | Shanghai       | 89.3  | 0.107  |
| 2020 | Jiangsu        | 73.44 | 0.2656 |
| 2020 | Zhejiang       | 72.17 | 0.2783 |
| 2020 | Anhui          | 58.33 | 0.4167 |
| 2020 | Fujian         | 68.75 | 0.3125 |
| 2020 | Jiangxi        | 60.44 | 0.3956 |
| 2020 | Shandong       | 63.05 | 0.3695 |
| 2020 | Henan          | 55.43 | 0.4457 |
| 2020 | Hubei          | 62.89 | 0.3711 |
| 2020 | Hunan          | 58.76 | 0.4124 |
| 2020 | Guangdong      | 74.15 | 0.2585 |
| 2020 | Guangxi        | 54.2  | 0.458  |

|      |           |       |        |
|------|-----------|-------|--------|
| 2020 | Hainan    | 60.27 | 0.3973 |
| 2020 | Chongqing | 69.46 | 0.3054 |
| 2020 | Sichuan   | 56.73 | 0.4327 |
| 2020 | Guizhou   | 53.15 | 0.4685 |
| 2020 | Yunnan    | 50.05 | 0.4995 |
| 2020 | Tibet     | 35.73 | 0.6427 |
| 2020 | Shaanxi   | 62.66 | 0.3734 |
| 2020 | Gansu     | 52.23 | 0.4777 |
| 2020 | Qinghai   | 60.08 | 0.3992 |
| 2020 | Ningxia   | 64.96 | 0.3504 |
| 2020 | Xinjiang  | 56.53 | 0.4347 |

Degree of energy support: This represents the policies in the aspect of energy, which is computed as the ratio of electricity usage in rural areas to the total electricity usage in each province and city.

**Table S4.** 2017-2020 China's 31 provinces and cities degree of energy support calculation result statistics

|      |                   |                                                  | Total electricity<br>usage in<br>each(Billion<br>kWh) province<br>and city(Billion<br>kWh) | Degree of<br>Energy<br>Support |
|------|-------------------|--------------------------------------------------|--------------------------------------------------------------------------------------------|--------------------------------|
|      |                   | Rural electricity<br>consumption(Billion<br>kWh) |                                                                                            |                                |
| 2017 | Beijing           | 61.50                                            | 1066.8902                                                                                  | 0.057644                       |
| 2017 | Tianjin           | 40.30                                            | 805.5945                                                                                   | 0.050025                       |
| 2017 | Hebei             | 615.20                                           | 3441.7419                                                                                  | 0.178747                       |
| 2017 | Shanxi            | 99.30                                            | 1990.6135                                                                                  | 0.049884                       |
| 2017 | Inner<br>Mongolia | 78.90                                            | 2891.871437                                                                                | 0.027283                       |
| 2017 | Liaoning          | 528.00                                           | 2135.4959                                                                                  | 0.247249                       |
| 2017 | Jilin             | 53.00                                            | 702.9803                                                                                   | 0.075393                       |
| 2017 | Heilongjiang      | 79.80                                            | 928.5697                                                                                   | 0.085939                       |
| 2017 | Shanghai          | 1013.20                                          | 1526.7716                                                                                  | 0.663623                       |
| 2017 | Jiangsu           | 1888.00                                          | 5807.8899                                                                                  | 0.325075                       |
| 2017 | Zhejiang          | 976.70                                           | 4192.6282                                                                                  | 0.232957                       |
| 2017 | Anhui             | 171.30                                           | 1921.4817                                                                                  | 0.08915                        |
| 2017 | Fujian            | 388.40                                           | 2112.7185                                                                                  | 0.183839                       |
| 2017 | Jiangxi           | 108.50                                           | 1293.9826                                                                                  | 0.08385                        |
| 2017 | Shandong          | 488.50                                           | 5430.1595                                                                                  | 0.089961                       |
| 2017 | Henan             | 328.80                                           | 3166.1685                                                                                  | 0.103848                       |
| 2017 | Hubei             | 156.60                                           | 1868.9963                                                                                  | 0.083788                       |
| 2017 | Hunan             | 128.60                                           | 1581.5138                                                                                  | 0.081314                       |
| 2017 | Guangdong         | 1414.80                                          | 5958.967844                                                                                | 0.237424                       |
| 2017 | Guangxi           | 103.50                                           | 1444.9478                                                                                  | 0.071629                       |

|      |                |        |             |          |
|------|----------------|--------|-------------|----------|
| 2017 | Hainan         | 15.50  | 304.950538  | 0.050828 |
| 2017 | Chongqing      | 80.20  | 996.548982  | 0.080478 |
| 2017 | Sichuan        | 188.40 | 2205.1786   | 0.085435 |
| 2017 | Guizhou        | 95.10  | 1384.885058 | 0.06867  |
| 2017 | Yunnan         | 102.30 | 1538.104139 | 0.06651  |
| 2017 | Tibet          | 1.30   | 58.1888     | 0.022341 |
| 2017 | Shaanxi        | 130.80 | 1494.749845 | 0.087506 |
| 2017 | Gansu          | 55.90  | 1164.366    | 0.048009 |
| 2017 | Qinghai        | 6.40   | 687.0145    | 0.009316 |
| 2017 | Ningxia        | 14.60  | 978.3029    | 0.014924 |
| 2017 | Xinjiang       | 111.10 | 2542.8457   | 0.043691 |
| 2018 | Beijing        | 65.1   | 1142.38093  | 0.056986 |
| 2018 | Tianjin        | 36.9   | 861.4388286 | 0.042835 |
| 2018 | Hebei          | 505.2  | 3665.660677 | 0.13782  |
| 2018 | Shanxi         | 101.4  | 2160.527849 | 0.046933 |
| 2018 | Inner Mongolia | 85.5   | 3353.439732 | 0.025496 |
| 2018 | Liaoning       | 306.2  | 2302.3759   | 0.132993 |
| 2018 | Jilin          | 54.9   | 750.5674262 | 0.073145 |
| 2018 | Heilongjiang   | 82.8   | 973.8818733 | 0.085021 |
| 2018 | Shanghai       | 1053.4 | 1566.6595   | 0.672386 |
| 2018 | Jiangsu        | 1933.1 | 6128.2703   | 0.31544  |
| 2018 | Zhejiang       | 1008.3 | 4532.824785 | 0.222444 |
| 2018 | Anhui          | 180.8  | 2135.069288 | 0.084681 |
| 2018 | Fujian         | 403.9  | 2313.824617 | 0.174559 |
| 2018 | Jiangxi        | 112.5  | 1428.768024 | 0.078739 |
| 2018 | Shandong       | 416.2  | 5916.77285  | 0.070342 |
| 2018 | Henan          | 330.6  | 3417.676901 | 0.096732 |
| 2018 | Hubei          | 165.2  | 2071.4302   | 0.079752 |
| 2018 | Hunan          | 130.8  | 1745.243039 | 0.074947 |
| 2018 | Guangdong      | 1443.1 | 6323.353944 | 0.228217 |
| 2018 | Guangxi        | 108.2  | 1702.748894 | 0.063544 |
| 2018 | Hainan         | 17.4   | 326.780843  | 0.053247 |
| 2018 | Chongqing      | 79.5   | 1114.470578 | 0.071334 |
| 2018 | Sichuan        | 198.6  | 2459.489536 | 0.080748 |
| 2018 | Guizhou        | 98.4   | 1482.121819 | 0.066391 |
| 2018 | Yunnan         | 104.9  | 1679.077497 | 0.062475 |
| 2018 | Tibet          | 1.6    | 69.01978756 | 0.023182 |
| 2018 | Shaanxi        | 133.6  | 1594.173284 | 0.083805 |
| 2018 | Gansu          | 59.1   | 1289.523614 | 0.045831 |
| 2018 | Qinghai        | 6.6    | 738.3377449 | 0.008939 |
| 2018 | Ningxia        | 15.1   | 1064.847565 | 0.01418  |
| 2018 | Xinjiang       | 119.5  | 2138.32919  | 0.055885 |
| 2019 | Beijing        | 67.8   | 1166.396372 | 0.058128 |

|      |                |        |             |          |
|------|----------------|--------|-------------|----------|
| 2019 | Tianjin        | 39.2   | 878.433162  | 0.044625 |
| 2019 | Hebei          | 501.6  | 3856.058057 | 0.130081 |
| 2019 | Shanxi         | 104.9  | 2261.903452 | 0.046377 |
| 2019 | Inner Mongolia | 91.2   | 3653.015873 | 0.024966 |
| 2019 | Liaoning       | 177    | 2401.4733   | 0.073705 |
| 2019 | Jilin          | 54.9   | 780.365396  | 0.070352 |
| 2019 | Heilongjiang   | 85.6   | 995.628011  | 0.085976 |
| 2019 | Shanghai       | 1102   | 1568.5775   | 0.702547 |
| 2019 | Jiangsu        | 1949.1 | 6264.364    | 0.311141 |
| 2019 | Zhejiang       | 1026.7 | 4706.220244 | 0.218158 |
| 2019 | Anhui          | 189.1  | 2300.683239 | 0.082193 |
| 2019 | Fujian         | 417.9  | 2402.339635 | 0.173955 |
| 2019 | Jiangxi        | 119.2  | 1535.70328  | 0.077619 |
| 2019 | Shandong       | 435.9  | 6218.717545 | 0.070095 |
| 2019 | Henan          | 353.8  | 3364.169941 | 0.105167 |
| 2019 | Hubei          | 178.6  | 2214.300963 | 0.080658 |
| 2019 | Hunan          | 133    | 1864.320265 | 0.07134  |
| 2019 | Guangdong      | 1448   | 6695.85116  | 0.216253 |
| 2019 | Guangxi        | 126.5  | 1907.330447 | 0.066323 |
| 2019 | Hainan         | 18.7   | 354.8948    | 0.052692 |
| 2019 | Chongqing      | 80.9   | 1160.270484 | 0.069725 |
| 2019 | Sichuan        | 205.8  | 2635.825146 | 0.078078 |
| 2019 | Guizhou        | 104.9  | 1540.677154 | 0.068087 |
| 2019 | Yunnan         | 120.4  | 1812.26379  | 0.066436 |
| 2019 | Tibet          | 2.5    | 77.595715   | 0.032218 |
| 2019 | Shaanxi        | 137.8  | 1912.344563 | 0.072058 |
| 2019 | Gansu          | 61.7   | 1288.048689 | 0.047902 |
| 2019 | Qinghai        | 7.1    | 716.466108  | 0.00991  |
| 2019 | Ningxia        | 16.1   | 1083.897981 | 0.014854 |
| 2019 | Xinjiang       | 124.8  | 2867.5518   | 0.043521 |
| 2020 | Beijing        | 69.3   | 1140        | 0.060789 |
| 2020 | Tianjin        | 41     | 875         | 0.046857 |
| 2020 | Hebei          | 509.8  | 3934        | 0.129588 |
| 2020 | Shanxi         | 109.2  | 2342        | 0.046627 |
| 2020 | Inner Mongolia | 93.2   | 3900        | 0.023897 |
| 2020 | Liaoning       | 184.6  | 2423        | 0.076187 |
| 2020 | Jilin          | 56.6   | 805         | 0.070311 |
| 2020 | Heilongjiang   | 89.7   | 1014        | 0.088462 |
| 2020 | Shanghai       | 1087.1 | 1576        | 0.689784 |
| 2020 | Jiangsu        | 2011   | 6374        | 0.3155   |
| 2020 | Zhejiang       | 1038.1 | 4830        | 0.214928 |
| 2020 | Anhui          | 205.3  | 2428        | 0.084555 |

|      |           |        |      |          |
|------|-----------|--------|------|----------|
| 2020 | Fujian    | 445.1  | 2483 | 0.179259 |
| 2020 | Jiangxi   | 130.2  | 1627 | 0.080025 |
| 2020 | Shandong  | 445.6  | 6940 | 0.064207 |
| 2020 | Henan     | 373.2  | 3392 | 0.110024 |
| 2020 | Hubei     | 186.9  | 2144 | 0.087174 |
| 2020 | Hunan     | 134.7  | 1929 | 0.069829 |
| 2020 | Guangdong | 1467.5 | 6926 | 0.211883 |
| 2020 | Guangxi   | 141.3  | 2029 | 0.06964  |
| 2020 | Hainan    | 21     | 363  | 0.057851 |
| 2020 | Chongqing | 82.5   | 1186 | 0.069562 |
| 2020 | Sichuan   | 205.9  | 2865 | 0.071867 |
| 2020 | Guizhou   | 117.1  | 1586 | 0.073834 |
| 2020 | Yunnan    | 124    | 2025 | 0.061235 |
| 2020 | Tibet     | 2.9    | 82   | 0.035366 |
| 2020 | Shaanxi   | 126.8  | 1741 | 0.072832 |
| 2020 | Gansu     | 65.8   | 1376 | 0.04782  |
| 2020 | Qinghai   | 7.5    | 742  | 0.010108 |
| 2020 | Ningxia   | 16.8   | 1038 | 0.016185 |
| 2020 | Xinjiang  | 127.5  | 3099 | 0.041142 |

Degree of water support: This represents the supportive capacity of water infrastructure to agricultural production and to some extent reflects the effort in building agricultural water facilities. It is calculated as the ratio of the area of irrigated arable land to the total area of arable land in each province and city in a given year(Appendix Table S5).

**Table S5.** 2017-2020 China's 31 provinces and cities degree of water support calculation result statistics

|      |                | Arable irrigated<br>land(1000ha) | Sown area of<br>crops(1000ha) | Degree of<br>Water<br>Support |
|------|----------------|----------------------------------|-------------------------------|-------------------------------|
| 2017 | Beijing        | 115.50                           | 120.94                        | 0.955028                      |
| 2017 | Tianjin        | 306.60                           | 439.52                        | 0.69758                       |
| 2017 | Hebei          | 4474.70                          | 8381.65                       | 0.533869                      |
| 2017 | Shanxi         | 1511.20                          | 3577.62                       | 0.422404                      |
| 2017 | Inner Mongolia | 3174.80                          | 9014.22                       | 0.352199                      |
| 2017 | Liaoning       | 1610.60                          | 4172.32                       | 0.38602                       |
| 2017 | Jilin          | 1893.10                          | 6086.20                       | 0.311048                      |
| 2017 | Heilongjiang   | 6031.00                          | 14767.59                      | 0.408394                      |
| 2017 | Shanghai       | 190.80                           | 284.95                        | 0.669597                      |
| 2017 | Jiangsu        | 4131.90                          | 7556.40                       | 0.546808                      |
| 2017 | Zhejiang       | 1444.70                          | 1981.11                       | 0.729236                      |
| 2017 | Anhui          | 4504.10                          | 8726.68                       | 0.51613                       |
| 2017 | Fujian         | 1064.80                          | 1549.34                       | 0.687259                      |
| 2017 | Jiangxi        | 2039.40                          | 5638.46                       | 0.361695                      |
| 2017 | Shandong       | 5191.10                          | 11107.79                      | 0.467339                      |

|      |                |         |          |          |
|------|----------------|---------|----------|----------|
| 2017 | Henan          | 5273.60 | 14732.53 | 0.357956 |
| 2017 | Hubei          | 2919.20 | 7956.14  | 0.366912 |
| 2017 | Hunan          | 3145.90 | 8321.97  | 0.378023 |
| 2017 | Guangdong      | 1774.60 | 4227.51  | 0.419774 |
| 2017 | Guangxi        | 1669.90 | 5969.88  | 0.279721 |
| 2017 | Hainan         | 289.30  | 709.44   | 0.407786 |
| 2017 | Chongqing      | 694.30  | 3339.56  | 0.207902 |
| 2017 | Sichuan        | 2873.10 | 9575.05  | 0.300061 |
| 2017 | Guizhou        | 1114.10 | 5659.37  | 0.196859 |
| 2017 | Yunnan         | 1851.40 | 6790.80  | 0.272633 |
| 2017 | Tibet          | 261.20  | 254.05   | 1.028131 |
| 2017 | Shaanxi        | 1263.10 | 4063.88  | 0.310811 |
| 2017 | Gansu          | 1331.40 | 3752.03  | 0.354848 |
| 2017 | Qinghai        | 206.60  | 555.31   | 0.372042 |
| 2017 | Ningxia        | 511.50  | 1132.63  | 0.451605 |
| 2017 | Xinjiang       | 4952.30 | 5886.96  | 0.841232 |
| 2018 | Beijing        | 109.7   | 103.8    | 1.05684  |
| 2018 | Tianjin        | 304.7   | 429.3    | 0.70976  |
| 2018 | Hebei          | 4492.3  | 8197.1   | 0.548035 |
| 2018 | Shanxi         | 1518.7  | 3555.2   | 0.427177 |
| 2018 | Inner Mongolia | 3196.5  | 8824.1   | 0.362247 |
| 2018 | Liaoning       | 1619.3  | 4207.1   | 0.384897 |
| 2018 | Jilin          | 1893.1  | 6080.9   | 0.311319 |
| 2018 | Heilongjiang   | 6119.6  | 14673.3  | 0.417057 |
| 2018 | Shanghai       | 190.8   | 282.3    | 0.675877 |
| 2018 | Jiangsu        | 4179.8  | 7520.2   | 0.55581  |
| 2018 | Zhejiang       | 1440.8  | 1978.7   | 0.728155 |
| 2018 | Anhui          | 4538.3  | 8771.1   | 0.517415 |
| 2018 | Fujian         | 1085.2  | 1577.3   | 0.688011 |
| 2018 | Jiangxi        | 2032    | 5555.8   | 0.365744 |
| 2018 | Shandong       | 5236    | 11076.8  | 0.4727   |
| 2018 | Henan          | 5288.7  | 14783.4  | 0.357746 |
| 2018 | Hubei          | 2931.9  | 7952.9   | 0.368658 |
| 2018 | Hunan          | 3164    | 8111.1   | 0.390083 |
| 2018 | Guangdong      | 1775.2  | 4279.4   | 0.414825 |
| 2018 | Guangxi        | 1706.9  | 5972.4   | 0.285798 |
| 2018 | Hainan         | 290.5   | 712.9    | 0.407491 |
| 2018 | Chongqing      | 696.9   | 3348.5   | 0.208123 |
| 2018 | Sichuan        | 2932.5  | 9615.3   | 0.304983 |
| 2018 | Guizhou        | 1132.2  | 5477.2   | 0.206711 |
| 2018 | Yunnan         | 1898.1  | 6890.8   | 0.275454 |
| 2018 | Tibet          | 264.5   | 270.4    | 0.97818  |
| 2018 | Shaanxi        | 1275    | 4091     | 0.31166  |
| 2018 | Gansu          | 1337.5  | 3773.6   | 0.354436 |

|      |                |        |          |          |
|------|----------------|--------|----------|----------|
| 2018 | Qinghai        | 214    | 557.3    | 0.383994 |
| 2018 | Ningxia        | 523.4  | 1164.6   | 0.449425 |
| 2018 | Xinjiang       | 4883.5 | 6068.9   | 0.804676 |
| 2019 | Beijing        | 109.2  | 88.55    | 1.233197 |
| 2019 | Tianjin        | 304.8  | 410.27   | 0.742924 |
| 2019 | Hebei          | 4482.2 | 8132.69  | 0.551134 |
| 2019 | Shanxi         | 1519.3 | 3524.42  | 0.431078 |
| 2019 | Inner Mongolia | 3199.2 | 8885.02  | 0.360067 |
| 2019 | Liaoning       | 1629.2 | 4217.10  | 0.386332 |
| 2019 | Jilin          | 1909.5 | 6117.05  | 0.31216  |
| 2019 | Heilongjiang   | 6177.6 | 14770.08 | 0.418251 |
| 2019 | Shanghai       | 190.8  | 261.39   | 0.729933 |
| 2019 | Jiangsu        | 4205.4 | 7442.63  | 0.565042 |
| 2019 | Zhejiang       | 1405.4 | 1999.62  | 0.702834 |
| 2019 | Anhui          | 4580.8 | 8781.96  | 0.521615 |
| 2019 | Fujian         | 1076.8 | 1599.29  | 0.673299 |
| 2019 | Jiangxi        | 2036.1 | 5521.18  | 0.36878  |
| 2019 | Shandong       | 5271.4 | 10933.09 | 0.482151 |
| 2019 | Henan          | 5328.9 | 14713.98 | 0.362166 |
| 2019 | Hubei          | 2969   | 7815.89  | 0.379867 |
| 2019 | Hunan          | 3176.1 | 8122.79  | 0.391011 |
| 2019 | Guangdong      | 1773.4 | 4357.38  | 0.406988 |
| 2019 | Guangxi        | 1713.1 | 5989.21  | 0.286031 |
| 2019 | Hainan         | 290.6  | 676.24   | 0.429732 |
| 2019 | Chongqing      | 697.7  | 3345.74  | 0.208534 |
| 2019 | Sichuan        | 2954.1 | 9692.98  | 0.304767 |
| 2019 | Guizhou        | 1154   | 5481.56  | 0.210524 |
| 2019 | Yunnan         | 1922.5 | 6938.86  | 0.277063 |
| 2019 | Tibet          | 275.9  | 271.53   | 1.016082 |
| 2019 | Shaanxi        | 1285.2 | 4132.09  | 0.311029 |
| 2019 | Gansu          | 1328.9 | 3831.57  | 0.346829 |
| 2019 | Qinghai        | 213.3  | 553.54   | 0.385336 |
| 2019 | Ningxia        | 538.3  | 1152.96  | 0.466886 |
| 2019 | Xinjiang       | 4959.9 | 6169.99  | 0.803874 |
| 2020 | Beijing        | 109.4  | 98.18    | 1.114241 |
| 2020 | Tianjin        | 299.1  | 419.17   | 0.713551 |
| 2020 | Hebei          | 4470   | 8089.44  | 0.552572 |
| 2020 | Shanxi         | 1517.4 | 3541.51  | 0.428461 |
| 2020 | Inner Mongolia | 3199.1 | 8882.81  | 0.360145 |
| 2020 | Liaoning       | 1632.5 | 4287.78  | 0.380733 |
| 2020 | Jilin          | 1905.4 | 6150.99  | 0.309771 |
| 2020 | Heilongjiang   | 6171.6 | 14910.13 | 0.41392  |
| 2020 | Shanghai       | 165    | 255.16   | 0.646653 |
| 2020 | Jiangsu        | 4224.7 | 7478.40  | 0.56492  |

|      |           |        |          |          |
|------|-----------|--------|----------|----------|
| 2020 | Zhejiang  | 1415.7 | 2014.50  | 0.702755 |
| 2020 | Anhui     | 4608.8 | 8817.99  | 0.522659 |
| 2020 | Fujian    | 1110.4 | 1631.27  | 0.680697 |
| 2020 | Jiangxi   | 2038.5 | 5644.37  | 0.361156 |
| 2020 | Shandong  | 5293.6 | 10889.06 | 0.486139 |
| 2020 | Henan     | 5463.1 | 14687.99 | 0.371943 |
| 2020 | Hubei     | 3086   | 7974.39  | 0.386989 |
| 2020 | Hunan     | 3192.9 | 8400.13  | 0.380101 |
| 2020 | Guangdong | 1776.5 | 4451.81  | 0.399051 |
| 2020 | Guangxi   | 1731   | 6107.32  | 0.28343  |
| 2020 | Hainan    | 292.2  | 676.86   | 0.431697 |
| 2020 | Chongqing | 698.3  | 3372.54  | 0.207055 |
| 2020 | Sichuan   | 2992.2 | 9849.89  | 0.30378  |
| 2020 | Guizhou   | 1165.5 | 5475.35  | 0.212863 |
| 2020 | Yunnan    | 1978.1 | 6989.67  | 0.283003 |
| 2020 | Tibet     | 282.8  | 272.08   | 1.039415 |
| 2020 | Shaanxi   | 1336.8 | 4160.85  | 0.321281 |
| 2020 | Gansu     | 1338.6 | 3931.82  | 0.340453 |
| 2020 | Qinghai   | 219.2  | 571.42   | 0.383605 |
| 2020 | Ningxia   | 552.5  | 1174.23  | 0.470523 |
| 2020 | Xinjiang  | 4893.4 | 6280.01  | 0.779203 |

Degree of informatization: This represents the level of informatization in rural areas. It is calculated as the ratio of the number of internet access point in the rural areas of each province and city to the total number of internet access point in that province and city in a given year.

**Table S6.** 2017-2020 China's 31 provinces and cities degree of informatization calculation result statistics

|      |                | number of<br>internet<br>access point<br>in the<br>rural(10000) | total number of<br>internet access<br>point in the<br>province and<br>city(10000) | degree of<br>Informatization |
|------|----------------|-----------------------------------------------------------------|-----------------------------------------------------------------------------------|------------------------------|
| 2017 | Beijing        | 70.78                                                           | 541.936                                                                           | 0.130599                     |
| 2017 | Tianjin        | 14.38                                                           | 339.3455                                                                          | 0.042362                     |
| 2017 | Hebei          | 721.03                                                          | 1910.1037                                                                         | 0.377483                     |
| 2017 | Shanxi         | 185.81                                                          | 872.8714                                                                          | 0.212871                     |
| 2017 | Inner Mongolia | 103.47                                                          | 493.9967                                                                          | 0.209447                     |
| 2017 | Liaoning       | 213.72                                                          | 1058.6202                                                                         | 0.201881                     |
| 2017 | Jilin          | 74.99                                                           | 501.4876                                                                          | 0.14953                      |
| 2017 | Heilongjiang   | 150.77                                                          | 664.5863                                                                          | 0.226858                     |
| 2017 | Shanghai       | 0.60                                                            | 681.3347                                                                          | 0.000881                     |
| 2017 | Jiangsu        | 1152.91                                                         | 3106.1459                                                                         | 0.37117                      |
| 2017 | Zhejiang       | 604.18                                                          | 2464.5659                                                                         | 0.245148                     |
| 2017 | Anhui          | 422.84                                                          | 1323.6528                                                                         | 0.319452                     |



|      |                |        |           |          |
|------|----------------|--------|-----------|----------|
| 2017 | Fujian         | 459.98 | 1373.599  | 0.334871 |
| 2017 | Jiangxi        | 309.30 | 997.0684  | 0.310206 |
| 2017 | Shandong       | 844.61 | 2588.7434 | 0.326264 |
| 2017 | Henan          | 592.81 | 2128.3817 | 0.278526 |
| 2017 | Hubei          | 263.43 | 1242.9214 | 0.211948 |
| 2017 | Hunan          | 374.05 | 1315.4807 | 0.284344 |
| 2017 | Guangdong      | 611.81 | 3246.8258 | 0.188433 |
| 2017 | Guangxi        | 296.20 | 967.9745  | 0.306005 |
| 2017 | Hainan         | 79.56  | 228.7071  | 0.347881 |
| 2017 | Chongqing      | 205.48 | 866.9317  | 0.237024 |
| 2017 | Sichuan        | 737.21 | 2167.5285 | 0.340113 |
| 2017 | Guizhou        | 131.90 | 568.5707  | 0.231988 |
| 2017 | Yunnan         | 118.33 | 812.5821  | 0.145628 |
| 2017 | Tibet          | 5.94   | 61.2393   | 0.097068 |
| 2017 | Shaanxi        | 241.04 | 903.2156  | 0.266867 |
| 2017 | Gansu          | 196.37 | 576.3783  | 0.340691 |
| 2017 | Qinghai        | 14.24  | 120.1494  | 0.118538 |
| 2017 | Ningxia        | 18.56  | 159.1542  | 0.116642 |
| 2017 | Xinjiang       | 161.59 | 569.9104  | 0.283544 |
| 2018 | Beijing        | 67.8   | 638.8     | 0.106137 |
| 2018 | Tianjin        | 26.2   | 437.91    | 0.05983  |
| 2018 | Hebei          | 857.5  | 2159.77   | 0.397033 |
| 2018 | Shanxi         | 196.7  | 991.03    | 0.19848  |
| 2018 | Inner Mongolia | 96.4   | 628.28    | 0.153435 |
| 2018 | Liaoning       | 213.5  | 1135.99   | 0.187942 |
| 2018 | Jilin          | 94.3   | 588.22    | 0.160314 |
| 2018 | Heilongjiang   | 241.1  | 810.67    | 0.297408 |
| 2018 | Shanghai       | 0.2    | 772.92    | 0.000259 |
| 2018 | Jiangsu        | 1244.4 | 3351.87   | 0.371255 |
| 2018 | Zhejiang       | 902.3  | 2653.79   | 0.340004 |
| 2018 | Anhui          | 640.4  | 1662.42   | 0.385222 |
| 2018 | Fujian         | 568    | 1629.12   | 0.348654 |
| 2018 | Jiangxi        | 415.3  | 1323.36   | 0.313822 |
| 2018 | Shandong       | 951.3  | 2884.82   | 0.329761 |
| 2018 | Henan          | 729.7  | 2503.91   | 0.291424 |
| 2018 | Hubei          | 406.6  | 1480.73   | 0.274594 |
| 2018 | Hunan          | 520.2  | 1635.32   | 0.318103 |
| 2018 | Guangdong      | 627.3  | 3597.84   | 0.174355 |
| 2018 | Guangxi        | 475.8  | 1230.57   | 0.38665  |
| 2018 | Hainan         | 82.6   | 279.12    | 0.29593  |
| 2018 | Chongqing      | 215.8  | 1070.14   | 0.201656 |
| 2018 | Sichuan        | 851.9  | 2624.49   | 0.324596 |
| 2018 | Guizhou        | 164.1  | 732.01    | 0.224177 |
| 2018 | Yunnan         | 305.9  | 1019.43   | 0.30007  |

|      |                |         |           |          |
|------|----------------|---------|-----------|----------|
| 2018 | Tibet          | 12.1    | 78.21     | 0.154712 |
| 2018 | Shaanxi        | 284.1   | 1057.4    | 0.268678 |
| 2018 | Gansu          | 277.9   | 742.84    | 0.374105 |
| 2018 | Qinghai        | 34.4    | 152.9     | 0.224984 |
| 2018 | Ningxia        | 42.4    | 217.02    | 0.195374 |
| 2018 | Xinjiang       | 195.8   | 647.25    | 0.302511 |
| 2019 | Beijing        | 61.80   | 688.1051  | 0.089812 |
| 2019 | Tianjin        | 44.10   | 523.6254  | 0.084221 |
| 2019 | Hebei          | 952.40  | 2359.6651 | 0.403617 |
| 2019 | Shanxi         | 216.90  | 1126.062  | 0.192618 |
| 2019 | Inner Mongolia | 87.70   | 682.504   | 0.128497 |
| 2019 | Liaoning       | 128.50  | 1230.4063 | 0.104437 |
| 2019 | Jilin          | 96.50   | 618.2973  | 0.156074 |
| 2019 | Heilongjiang   | 267.60  | 848.2783  | 0.315463 |
| 2019 | Shanghai       | 1.40    | 890.1477  | 0.001573 |
| 2019 | Jiangsu        | 1368.30 | 3585.7369 | 0.381595 |
| 2019 | Zhejiang       | 922.50  | 2778.9142 | 0.331964 |
| 2019 | Anhui          | 705.90  | 1864.7013 | 0.378559 |
| 2019 | Fujian         | 788.50  | 1779.043  | 0.443216 |
| 2019 | Jiangxi        | 460.90  | 1448.7784 | 0.31813  |
| 2019 | Shandong       | 1017.00 | 3186.0969 | 0.319199 |
| 2019 | Henan          | 783.10  | 2769.1966 | 0.28279  |
| 2019 | Hubei          | 499.70  | 1708.3228 | 0.292509 |
| 2019 | Hunan          | 645.50  | 1873.7724 | 0.344492 |
| 2019 | Guangdong      | 930.10  | 3801.6369 | 0.244658 |
| 2019 | Guangxi        | 601.50  | 1447.3997 | 0.415573 |
| 2019 | Hainan         | 99.70   | 323.1976  | 0.30848  |
| 2019 | Chongqing      | 243.60  | 1163.9905 | 0.20928  |
| 2019 | Sichuan        | 981.10  | 2811.746  | 0.348929 |
| 2019 | Guizhou        | 177.20  | 892.8549  | 0.198464 |
| 2019 | Yunnan         | 372.20  | 1156.0786 | 0.32195  |
| 2019 | Tibet          | 16.10   | 91.4131   | 0.176124 |
| 2019 | Shaanxi        | 319.50  | 1197.6613 | 0.26677  |
| 2019 | Gansu          | 321.90  | 870.6881  | 0.369708 |
| 2019 | Qinghai        | 44.20   | 174.5418  | 0.253234 |
| 2019 | Ningxia        | 54.20   | 259.0947  | 0.20919  |
| 2019 | Xinjiang       | 267.40  | 775.9005  | 0.344632 |
| 2020 | Beijing        | 94.39   | 747.31    | 0.126306 |
| 2020 | Tianjin        | 52.84   | 534.6     | 0.09884  |
| 2020 | Hebei          | 1038.92 | 2534.35   | 0.409935 |
| 2020 | Shanxi         | 233.63  | 1252.11   | 0.186589 |
| 2020 | Inner Mongolia | 87.25   | 722.92    | 0.120691 |
| 2020 | Liaoning       | 77      | 1331.24   | 0.057841 |
| 2020 | Jilin          | 112.6   | 654.23    | 0.172111 |

|             |                     |         |         |          |
|-------------|---------------------|---------|---------|----------|
| <b>2020</b> | <b>Heilongjiang</b> | 164.22  | 886.33  | 0.185281 |
| <b>2020</b> | <b>Shanghai</b>     | 2.73    | 918.96  | 0.002971 |
| <b>2020</b> | <b>Jiangsu</b>      | 1416.43 | 3756.83 | 0.377028 |
| <b>2020</b> | <b>Zhejiang</b>     | 892.69  | 2938.83 | 0.303757 |
| <b>2020</b> | <b>Anhui</b>        | 802.13  | 2092.99 | 0.383246 |
| <b>2020</b> | <b>Fujian</b>       | 577.57  | 1831.02 | 0.315436 |
| <b>2020</b> | <b>Jiangxi</b>      | 518.5   | 1510.52 | 0.343259 |
| <b>2020</b> | <b>Shandong</b>     | 1070.9  | 3445.62 | 0.3108   |
| <b>2020</b> | <b>Henan</b>        | 901.69  | 3090.94 | 0.29172  |
| <b>2020</b> | <b>Hubei</b>        | 570.26  | 1870.16 | 0.304926 |
| <b>2020</b> | <b>Hunan</b>        | 701.64  | 2113.17 | 0.332032 |
| <b>2020</b> | <b>Guangdong</b>    | 1017.02 | 3889.99 | 0.261445 |
| <b>2020</b> | <b>Guangxi</b>      | 700.66  | 1650.84 | 0.424426 |
| <b>2020</b> | <b>Hainan</b>       | 111.22  | 351.47  | 0.316442 |
| <b>2020</b> | <b>Chongqing</b>    | 253.02  | 1228.37 | 0.20598  |
| <b>2020</b> | <b>Sichuan</b>      | 1109.23 | 2975.45 | 0.372794 |
| <b>2020</b> | <b>Guizhou</b>      | 224.3   | 1002.4  | 0.223763 |
| <b>2020</b> | <b>Yunnan</b>       | 404     | 1278.12 | 0.316089 |
| <b>2020</b> | <b>Tibet</b>        | 24.75   | 96.33   | 0.256929 |
| <b>2020</b> | <b>Shaanxi</b>      | 346.56  | 1368.96 | 0.253156 |
| <b>2020</b> | <b>Gansu</b>        | 336.03  | 931.42  | 0.360772 |
| <b>2020</b> | <b>Qinghai</b>      | 50.12   | 181.97  | 0.27543  |
| <b>2020</b> | <b>Ningxia</b>      | 61.71   | 283.64  | 0.217565 |
| <b>2020</b> | <b>Xinjiang</b>     | 235.64  | 883.86  | 0.266603 |
